# Supplementary material
Source: publisher site journal article supplement (https://www.dovepress.com/article/473928)
Supplement: Supplementary file 1 [file get_supplementary_file.php]

**Toward understanding the anticancer activity of the phytocompounds from *Eugenia uniflora* using molecular docking, *in silico* toxicity and dynamics studies**

Pallab Kar 1,2,*, Ayodeji O. Oriola 2, Adebola O. Oyedeji 1,2,*

1 African Medicinal Flora and Fauna Research Niche, Walter Sisulu University, Mthatha, South Africa

2 Department of Chemical and Physical Sciences, Walter Sisulu University, Mthatha, South Africa

*Correspondence: Pallab Kar (pallabkar.bio@gmail.com), Adebola O. Oyedeji (aoyedeji@wsu.ac.za)

**Supplementary File**

**Table S1.** List of phytocompounds from *Eugenia uniflora* used in the present study.

| **Sl. No.** | **CID Number** | **Phytocompounds** |
| --- | --- | --- |
| **Carotenoids** | | |
|  | CID: 5281252 | (9Z) rubixanthin |
|  | CID: 5280899 | (all E) zeaxanthin |
|  | CID: 5280489 | Beta Carotene |
|  | CID: 5281235 | Beta cryptoxanthin |
|  | CID: 5281243 | all E lutein |
| **Phenolic compounds** | | |
|  | CID: 1794427 | Chlorogenic acid |
|  | CID: 323 | Coumarin |
|  | CID: 197081 | Cyanidin 3-O-glucoside |
|  | CID: 21578281 | Daucic acid |
|  | CID: 443650 | Delphinidin 3-O-glucoside |
|  | CID: 5281855 | Ellagic acid |
|  | CID: 72276 | Epicatechin |
|  | CID: 370 | Gallic acid |
|  | CID: 4628122 | Galloyl hexoside |
|  | CID: 129650210 | Galloylquinic acid |
|  | CID: 5280804 | Isoquercitrin |
|  | CID: 5280863 | Kaempferol |
|  | CID: 12311099 | Myricetin 3-O-hexoside |
|  | CID: 129680227 | O-galloyl-D-glucose |
|  | CID: 16129800 | Oenothein B |
|  | CID: 443648 | Pelargonidin 3-O-glucoside |
|  | CID: 5378597 | Quercetin 3-O-hexoside |
|  | CID: 5280459 | Quercetin 3-O-rhamnoside |
|  | CID: 6508 | Quinic acid |
|  | CID: 445154 | Resveratrol |
|  | CID: 338 | Salicylic acid |
|  | CID: 10742 | Syringic acid |
|  | CID: 8468 | Vanillic acid |
|  | CID: 1183 | Vanillin |
|  | CID: 637542 | p Coumaric acid |
|  | CID: 9945785 | p Coumaroylquinic acid |
| **Flavonoids** | | |
|  | CID: 72277 | Epigallocatechin |
|  | CID: 13889199 | Galloylastragalin |
|  | CID: 160481 | Isosakuranetin |
|  | CID: 5280637 | Luteolin 7-O-glucoside |
|  | CID: 5281672 | Myricetin |
|  | CID: 14524429 | Myricetin 3-arabinofuranoside |
|  | CID: 21672568 | Myricetin 3-arabinoside |
|  | CID: 44259426 | Myricetin 3-glucoside |
|  | CID: 21477996 | Myricetin pentoside |
|  | CID: 5280343 | Quercetin |
|  | CID: 13889202 | Quercetin 3-(2 galloylglucoside) |
|  | CID: 10252339 | Quercetin 3-arabinoside |
|  | CID: 5321278 | Quercetin 3-xyloside |

**Table S2.** Binding energy scores of the 44 phytocompounds with the mdm2 protein.

| **Sl. No.** | **Phytocompounds** | **Binding energy scores (kcal/mol)** |
| --- | --- | --- |
| **mdm2** |
| **Carotenoids** | | |
|  | (9Z) rubixanthin | -5.6 |
|  | (all E) zeaxanthin | -6.2 |
|  | Beta Carotene | -5.9 |
|  | Beta cryptoxanthin | -6.4 |
|  | all E lutein | -5.8 |
| **Phenolic compounds** | | |
|  | Chlorogenic acid | -6.7 |
|  | Coumarin | -4.9 |
|  | **Cyanidin 3-O-glucoside** | **-7.5** |
|  | Daucic acid | -4.5 |
|  | Delphinidin_3-O-glucoside | -6.3 |
|  | Ellagic acid | -6.1 |
|  | Epicatechin | -6.3 |
|  | Gallic acid | -4.3 |
|  | Galloyl hexoside | -5.6 |
|  | Galloylquinic acid | -6.5 |
|  | Isoquercitrin | -6.9 |
|  | Kaempferol | -6.4 |
|  | Myricetin 3-O-hexoside | -6.3 |
|  | O-galloyl-D-glucose | -4.9 |
|  | Oenothein B | -3.7 |
|  | Pelargonidin_3-O-glucoside | -6.8 |
|  | Quercetin_3-O-hexoside | -6.9 |
|  | Quercetin 3-O-rhamnoside | -7.0 |
|  | Quinic acid | -4.6 |
|  | **Resveratrol** | **-7.6** |
|  | Salicylic acid | -4.3 |
|  | Syringic acid | -4.4 |
|  | Vanillic acid | -4.4 |
|  | Vanillin | -4.5 |
|  | p Coumaric acid | -4.2 |
|  | p Coumaroylquinic acid | -6.8 |
| **Flavonoids** | | |
|  | Epigallocatechin | -5.9 |
|  | **Galloylastragalin** | **-8.5** |
|  | Isosakuranetin | -6.2 |
|  | Luteolin 7-O-glucoside | -6.7 |
|  | **Myricetin** | **-7.7** |
|  | Myricetin 3-arabinofuranoside | -6.5 |
|  | Myricetin_3-arabinoside | -6.4 |
|  | Myricetin_3-glucoside | -6.3 |
|  | Myricetin pentoside | -6.5 |
|  | Quercetin | -6.4 |
|  | Quercetin 3-(2 galloylglucoside) | -6.8 |
|  | Quercetin 3-arabinoside | -7.1 |
|  | Quercetin_3-xyloside | -7.1 |

**Table S3.** Binding energy scores of the 44 phytocompounds with the Bcl-xL protein.

| **Sl. No.** | **Phytocompounds** | **Binding energy scores (kcal/mol)** |
| --- | --- | --- |
| **Bcl-xL** |
| **Carotenoids** | | |
|  | (9Z) rubixanthin | -7.2 |
|  | (all E) zeaxanthin | -7.0 |
|  | Beta Carotene | -7.1 |
|  | Beta cryptoxanthin | -6.9 |
|  | all E lutein | -7.0 |
| **Phenolic compounds** | | |
|  | Chlorogenic acid | -7.1 |
|  | Coumarin | -5.7 |
|  | **Cyanidin 3-O-glucoside** | **-7.6** |
|  | Daucic acid | -5.1 |
|  | Delphinidin_3-O-glucoside | -6.4 |
|  | Ellagic acid | -6.5 |
|  | Epicatechin | -7.0 |
|  | Gallic acid | -5.0 |
|  | Galloyl hexoside | -6.4 |
|  | Galloylquinic acid | -6.9 |
|  | Isoquercitrin | -7.4 |
|  | Kaempferol | -6.9 |
|  | Myricetin 3-O-hexoside | -7.1 |
|  | O-galloyl-D-glucose | -5.7 |
|  | Oenothein B | -5.4 |
|  | Pelargonidin_3-O-glucoside | -6.8 |
|  | Quercetin_3-O-hexoside | -6.5 |
|  | Quercetin 3-O-rhamnoside | -7.2 |
|  | Quinic acid | -5.3 |
|  | Resveratrol | -6.5 |
|  | Salicylic acid | -5.4 |
|  | Syringic acid | -5.0 |
|  | Vanillic acid | -5.3 |
|  | Vanillin | -4.9 |
|  | *p* Coumaric acid | -5.7 |
|  | ***p* Coumaroylquinic acid** | **-7.5** |
| **Flavonoids** | | |
|  | Epigallocatechin | -6.7 |
|  | **Galloylastragalin** | **-8.7** |
|  | Isosakuranetin | -7.0 |
|  | Luteolin 7-O-glucoside | -7.1 |
|  | **Myricetin** | **-7.9** |
|  | Myricetin 3-arabinofuranoside | -7.1 |
|  | Myricetin_3-arabinoside | -7.1 |
|  | Myricetin_3-glucoside | -7.4 |
|  | Myricetin pentoside | -7.2 |
|  | Quercetin | -6.8 |
|  | Quercetin 3-(2 galloylglucoside) | -7.7 |
|  | Quercetin 3-arabinoside | -7.1 |
|  | Quercetin_3-xyloside | -7.2 |
